# Supplementary material for: HIV-specific and resistant CAR T cells promote control of HIV replication in people with HIV
Source: Research Square preprint supplement (doi:10.21203/rs.3.rs-10181812/v1), 2026-07-03
Supplement: Supplementary file 1 [file 16dd093b0092b01c161284e3.pdf]

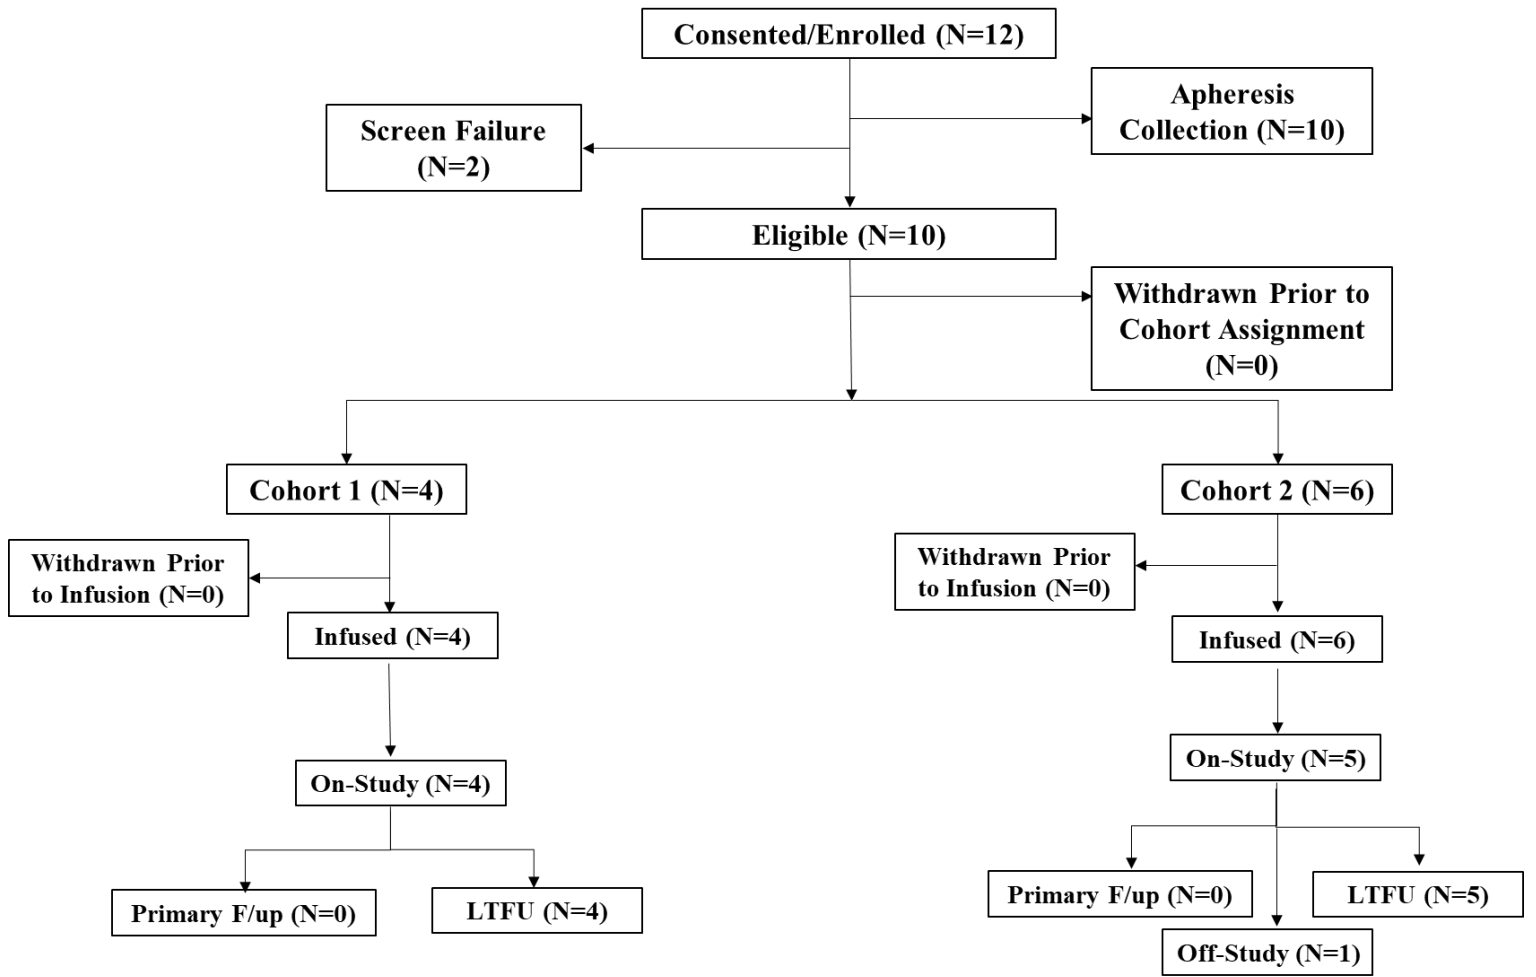

Tebas et al Fig S1

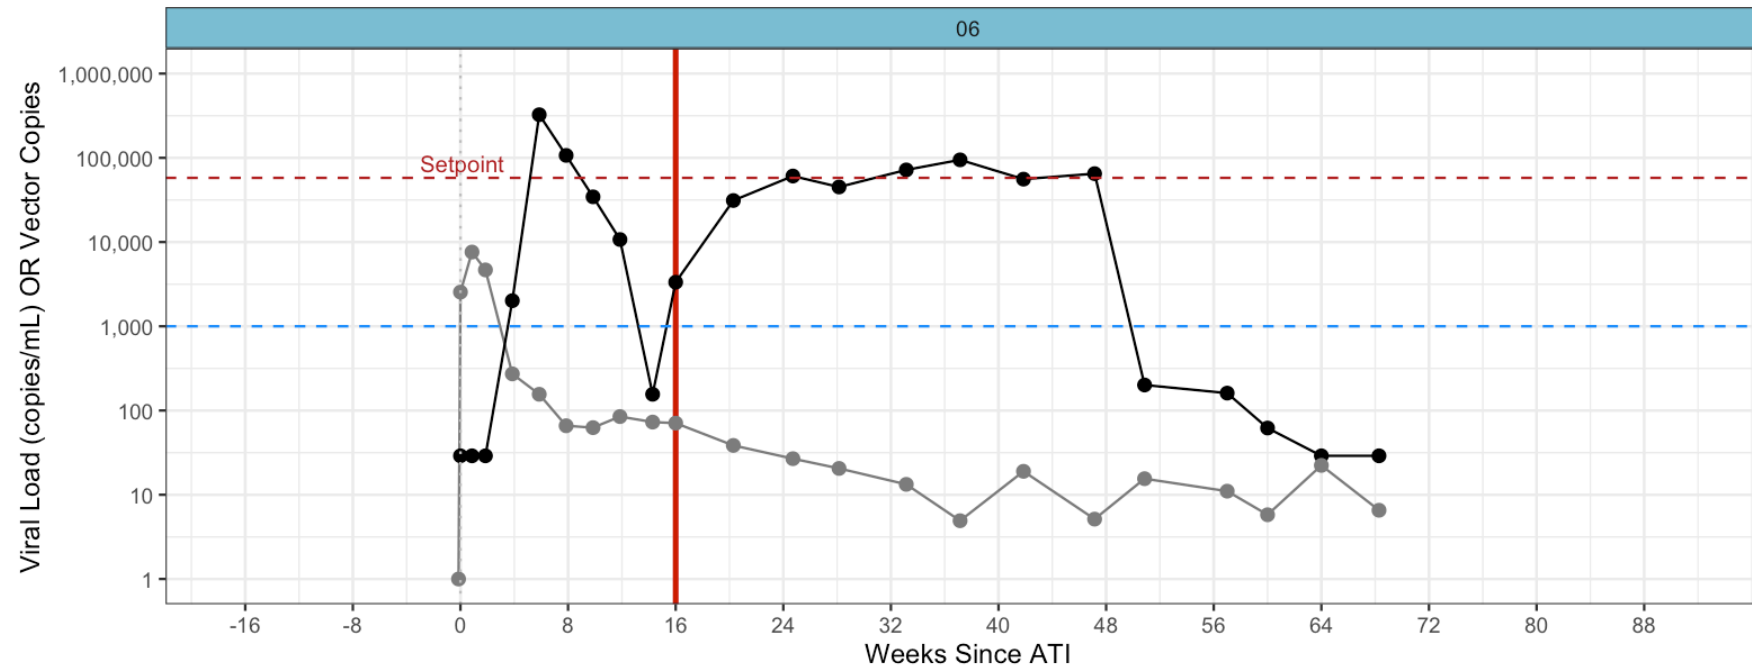

Fig S2: Extended viral load and vector copy presence for participant 06. A) Viral load (black line) and vector copies per million PBMCs (grey line) are shown. Red line indicates when the ATI should have ended. ART was resumed 48 weeks after start of ATI.

**Table S1. Participant baseline characteristics and CART product characteristics**

| Participant ID | Age, y | CCR5   | Race             | Ethnicity    | Cohort         | HIV dx date | CD4 nadir | Enrollment date | CD4 at enrollment | ART at entry  | Total cell dose administered | CAR T-cell dose administered | CD4 CAR expression, % | CD4 CAR copy number, average copies/cell |
|----------------|--------|--------|------------------|--------------|----------------|-------------|-----------|-----------------|-------------------|---------------|------------------------------|------------------------------|-----------------------|------------------------------------------|
| CD4CAR-ZFN-01  | 21     | Δ32/wt | African American | Non-Hispanic | Cohort 2       | 03/06/2015  | 710       | 08/23/2019      | 681               | TAF/FTC/BIC   | 6.2 x 10 <sup>9</sup>        | 2.15 x 10 <sup>9</sup>       | 34.6                  | 1.79                                     |
| CD4CAR-ZFN-02  | 58     | Δ32/w  | Caucasian        | Non-Hispanic | Cohort 2       | 08/15/2009  | 797       | 09/05/2019      | 1785              | TAF/FTC/BIC   | 1.00 x 10 <sup>10</sup>      | 1.60 x 10 <sup>9</sup>       | 16                    | 0.88                                     |
| CD4CAR-ZFN-03  | 47     | wt/wt  | African American | Non-Hispanic | Cohort 1       | 08/15/2011  | 456       | 02/17/2020      | 1430              | ABC/3TC/DTG   | 3.70 x 10 <sup>9</sup>       | 1.76 x 10 <sup>9</sup>       | 47.7                  | 1.04                                     |
| CD4CAR-ZFN-04  | 58     | wt/wt  | African American | Non-Hispanic | Screen failure | 1996        | NA        | 01/31/2020      | 394               | NA            | NA                           | NA                           | NA                    | NA                                       |
| CD4CAR-ZFN-05  | 56     | wt/wt  | African American | Non-Hispanic | Cohort 2       | 05/20/2010  | 435       | 07/17/2020      | 780               | TAF/FTC/EVG/c | 5.8 x 10 <sup>9</sup>        | 2.15 x 10 <sup>9</sup>       | 53.6                  | 0.97                                     |
| CD4CAR-ZFN-06  | 38     | wt/wt  | African American | Non-Hispanic | Cohort 1       | 03/15/2012  | 470       | 08/18/2020      | 559               | TAF/FTC/EVG/c | 8.00 x 10 <sup>9</sup>       | 1.93 x 10 <sup>9</sup>       | 63.4                  | 0.83                                     |
| CD4CAR-ZFN-07  | 57     | wt/wt  | Caucasian        | Non-Hispanic | Cohort 1       | 08/07/2017  | 333       | 02/09/2021      | 677               | TAF/FTC/EVG/c | 1.80 x 10 <sup>9</sup>       | 1.13 x 10 <sup>9</sup>       | 26.6                  | 0.91                                     |
| CD4CAR-ZFN-08  | 41     | Δ32/w  | African American | Non-Hispanic | Cohort 2       | 09/15/2010  | 412       | 02/26/2021      | 740               | TAF/FTC/BIC   | 5.00 x 10 <sup>9</sup>       | 2.14 x 10 <sup>9</sup>       | 50.1                  | 0.78                                     |
| CD4CAR-ZFN-09  | 33     | wt/wt  | Caucasian        | Non-Hispanic | Screen failure | 08/15/2012  | NA        | NA              | NA                | NA            | NA                           | NA                           | NA                    | NA                                       |
| CD4CAR-ZFN-10  | 38     | wt/wt  | African American | Non-Hispanic | Cohort 2       | 12/10/2014  | 700       | 07/02/2021      | 833               | TAF/FTC/DRV/c | 9.95 x 10 <sup>9</sup>       | 1.97 x 10 <sup>9</sup>       | 46.6                  | 0.68                                     |
| CD4CAR-ZFN-11  | 65     | wt/wt  | Caucasian        | Non-Hispanic | Cohort 1       | 07/15/1991  | 350       | 07/07/2021      | 977               | TAF/FTC/BIC   | 2.75 x 10 <sup>9</sup>       | 2.18 x 10 <sup>9</sup>       | 13.7                  | 0.16                                     |
| CD4CAR-ZFN-12  | 50     | wt/wt  | Caucasian        | Hispanic     | Cohort 2       | 03/13/2003  | 369       | 09/21/2021      | 659               | TAF/FTC/EVG/c | 1.00 x 10 <sup>10</sup>      | 3.85 x 10 <sup>9</sup>       | 47.8                  | 0.63                                     |

Abbreviations: ABC, abacavir; ART, antiretroviral therapy; BIC, bictegravir; CAR, chimeric antigen receptor; c, cobicistat; DRV, darunavir; DTG, dolutegravir; dx, diagnosis; EVG, elvitegravir; FTC, emtricitabine; NA, not available or not applicable; TAF, tenofovir alafenamide; 3TC, lamivudine.

**Supplemental Table 2: All Adverse Events**

| Category<br>Toxicity                                                         | Grades    |          |          |          |          | Total     |
|------------------------------------------------------------------------------|-----------|----------|----------|----------|----------|-----------|
|                                                                              | 1         | 2        | 3        | 4        | 5        |           |
| <b>Blood and lymphatic system disorders</b>                                  | <b>3</b>  | <b>0</b> | <b>0</b> | <b>0</b> | <b>0</b> | <b>3</b>  |
| <i>Blood and lymphatic system disorders - Other (Adenopathy)</i>             | 2         | 0        | 0        | 0        | 0        | 2         |
| <i>Cervical Adenopathy</i>                                                   | 1         | 0        | 0        | 0        | 0        | 1         |
| <b>Eye disorders</b>                                                         | <b>0</b>  | <b>1</b> | <b>0</b> | <b>0</b> | <b>0</b> | <b>1</b>  |
| <i>Conjunctivitis</i>                                                        | 0         | 1        | 0        | 0        | 0        | 1         |
| <b>Gastrointestinal disorders</b>                                            | <b>7</b>  | <b>0</b> | <b>0</b> | <b>0</b> | <b>0</b> | <b>7</b>  |
| <i>Anal condyloma</i>                                                        | 1         | 0        | 0        | 0        | 0        | 1         |
| <i>Diarrhea</i>                                                              | 1         | 0        | 0        | 0        | 0        | 1         |
| <i>Dysgeusia</i>                                                             | 5         | 0        | 0        | 0        | 0        | 5         |
| <b>General disorders and administration site conditions</b>                  | <b>4</b>  | <b>1</b> | <b>0</b> | <b>0</b> | <b>0</b> | <b>5</b>  |
| <i>Chills</i>                                                                | 1         | 0        | 0        | 0        | 0        | 1         |
| <i>Fatigue</i>                                                               | 2         | 0        | 0        | 0        | 0        | 2         |
| <i>General disorders and administration site conditions - Other (Nodule)</i> | 1         | 0        | 0        | 0        | 0        | 1         |
| <i>Flu like symptoms</i>                                                     | 0         | 1        | 0        | 0        | 0        | 1         |
| <b>Infections and infestations</b>                                           | <b>0</b>  | <b>4</b> | <b>0</b> | <b>0</b> | <b>0</b> | <b>4</b>  |
| <i>Chlamydia</i>                                                             | 0         | 1        | 0        | 0        | 0        | 1         |
| <i>Gonorrhea</i>                                                             | 0         | 1        | 0        | 0        | 0        | 1         |
| <i>Infections and infestations - Other (COVID-19)</i>                        | 0         | 2        | 0        | 0        | 0        | 2         |
| <b>Injury, poisoning and procedural complications</b>                        | <b>3</b>  | <b>0</b> | <b>0</b> | <b>0</b> | <b>0</b> | <b>3</b>  |
| <i>Vaccination complication</i>                                              | 3         | 0        | 0        | 0        | 0        | 3         |
| <b>Nervous system disorders</b>                                              | <b>1</b>  | <b>1</b> | <b>0</b> | <b>0</b> | <b>0</b> | <b>2</b>  |
| <i>Dizziness</i>                                                             | 1         | 0        | 0        | 0        | 0        | 1         |
| <i>Paresthesia</i>                                                           | 0         | 1        | 0        | 0        | 0        | 1         |
| <b>Renal and urinary disorders</b>                                           | <b>0</b>  | <b>1</b> | <b>0</b> | <b>0</b> | <b>0</b> | <b>1</b>  |
| <i>Urinary tract infection</i>                                               | 0         | 1        | 0        | 0        | 0        | 1         |
| <b>Respiratory, thoracic and mediastinal disorders</b>                       | <b>2</b>  | <b>0</b> | <b>0</b> | <b>0</b> | <b>0</b> | <b>2</b>  |
| <i>Cold</i>                                                                  | 1         | 0        | 0        | 0        | 0        | 1         |
| <i>Sore throat</i>                                                           | 1         | 0        | 0        | 0        | 0        | 1         |
| <b>Skin and subcutaneous tissue disorders</b>                                | <b>1</b>  | <b>1</b> | <b>0</b> | <b>0</b> | <b>0</b> | <b>2</b>  |
| <i>Skin and subcutaneous tissue disorders - Other (Rash)</i>                 | 0         | 1        | 0        | 0        | 0        | 1         |
| <i>Skin and subcutaneous tissue disorders - Other (Skin lesion)</i>          | 1         | 0        | 0        | 0        | 0        | 1         |
| <b>Total</b>                                                                 | <b>21</b> | <b>9</b> | <b>0</b> | <b>0</b> | <b>0</b> | <b>30</b> |

**Supplemental Table 3: All Related Adverse Events**

| <b>Category<br/>Toxicity</b>                                | <b>Grades</b> |          |          |          |          | <b>Total</b> |
|-------------------------------------------------------------|---------------|----------|----------|----------|----------|--------------|
|                                                             | <b>1</b>      | <b>2</b> | <b>3</b> | <b>4</b> | <b>5</b> |              |
| <b>Gastrointestinal disorders</b>                           | <b>3</b>      | <b>0</b> | <b>0</b> | <b>0</b> | <b>0</b> | <b>3</b>     |
| <i>Dysgeusia</i>                                            | 3             | 0        | 0        | 0        | 0        | 3            |
| <b>General disorders and administration site conditions</b> | <b>1</b>      | <b>0</b> | <b>0</b> | <b>0</b> | <b>0</b> | <b>1</b>     |
| <i>Chills</i>                                               | 1             | 0        | 0        | 0        | 0        | 1            |
| <b>Total</b>                                                | <b>4</b>      | <b>0</b> | <b>0</b> | <b>0</b> | <b>0</b> | <b>4</b>     |

| Data Information (To Be Completed by Agency Representative - System Generated Field) |                    |           |             |             |                                                         |                                                         |                                                         |                                                             |                                                             |                                                             |                       |                        | Data Information (To Be Completed by CPAC User) |                 |                |        |                           |        |                           |                           |
|--------------------------------------------------------------------------------------|--------------------|-----------|-------------|-------------|---------------------------------------------------------|---------------------------------------------------------|---------------------------------------------------------|-------------------------------------------------------------|-------------------------------------------------------------|-------------------------------------------------------------|-----------------------|------------------------|-------------------------------------------------|-----------------|----------------|--------|---------------------------|--------|---------------------------|---------------------------|
| Sample ID*                                                                           | Analyte Requested* | Specimen* | Matrix*     | Tier Level* | Clinical ART Medication #1 (With Frequency Prescribed)* | Clinical ART Medication #2 (With Frequency Prescribed)* | Clinical ART Medication #3 (With Frequency Prescribed)* | Time Elapsed Since Last Date of Clinical ART Medication #1* | Time Elapsed Since Last Date of Clinical ART Medication #2* | Time Elapsed Since Last Date of Clinical ART Medication #3* | Weight of Person (kg) | Units of Time Elapsed* | Date of Sample Collection (MM/DD/YYYY - Y)      | Comment         | CPAC Sample ID | Run ID | EVG Concentration (ng/mL) | Run ID | TFV Concentration (ng/mL) | FTC Concentration (ng/mL) |
| 201908100004                                                                         | TFV, FTC, EVG      | Plasma    | Blood serum | Tier 2      | Generic (EVG)COBI (F) (A) (Q)                           |                                                         |                                                         | 21 (D)                                                      |                                                             |                                                             | 70.000                | Days                   | 10/24/21                                        | Baseline        | 01             | 1      | 100                       | 2      | 11.2                      | 100                       |
| 20191010111                                                                          | TFV, FTC, EVG      | Plasma    | Blood serum | Tier 2      | Generic (EVG)COBI (F) (A) (Q)                           |                                                         |                                                         | 25 (D)                                                      |                                                             |                                                             | 70.000                | Days                   | 10/19/21                                        | 4 weeks into AT | 02             | 1      | 80                        | 2      | 80                        | 80                        |
| 20191010110                                                                          | TFV, FTC, EVG      | Plasma    | Blood serum | Tier 2      | Generic (EVG)COBI (F) (A) (Q)                           |                                                         |                                                         | 25 (D)                                                      |                                                             |                                                             | 70.000                | Days                   | 10/19/21                                        | 4 weeks into AT | 03             | 1      | 80                        | 2      | 80                        | 80                        |
| 20191010117                                                                          | TFV, FTC, EVG      | Plasma    | Blood serum | Tier 2      | Generic (EVG)COBI (F) (A) (Q)                           |                                                         |                                                         | 21 (D)                                                      |                                                             |                                                             | 70.000                | Days                   | 10/17/21                                        | 2 weeks into AT | 04             | 1      | 80                        | 2      | 80                        | 80                        |

Dynamic range of assay: TFV/FTC (0.00-10,000ng/mL), EVG(0.0-10,000ng/mL)

| Participant ID | Time point | Viral sequence intactness | Integration Site | Gene                      | Reference human genome |
|----------------|------------|---------------------------|------------------|---------------------------|------------------------|
| CD4CAR-ZFN-02  | step2      | Intact                    | chr22:1384692    | nongenic, satellite       | T2T                    |
| CD4CAR-ZFN-02  | step2      | Intact                    | chr19:20547360   | ZNF737                    | GRCh38                 |
| CD4CAR-ZFN-03  | step2      | Intact                    | chr19:37436140   | ZNF569                    | GRCh38                 |
| CD4CAR-ZFN-05  | step2      | Intact                    | chr12:3897134    | PARP11-AS1                | GRCh38                 |
| CDCAR-ZFN-05   | step2      | Intact                    | chr1:134854422   | Pericentromeric satellite | T2T                    |
| CDCAR-ZFN-05   | step2      | Intact                    | chr19:29033560   | centromeric satellite     | T2T                    |
| CD4CAR-ZFN-06  | step2      | Intact                    | chr19:7644678    | STXBP2                    | GRCh38                 |
| CD4CAR-ZFN-08  | step2      | Intact                    | chr1:143213236   | nongenic                  | GRCh38                 |
| CD4CAR-ZFN-08  | step2      | Intact                    | chr1:132570273   | Pericentromeric Satellite | T2T                    |
| CD4CAR-ZFN-02  | step5      | Intact                    | chr2:112103799   | TMEM87B                   | GRCh38                 |
| CD4CAR-ZFN-02  | step5      | Intact                    | chr17:77344741   | SEPTIN9                   | GRCh38                 |
| CD4CAR-ZFN-02  | step5      | Intact                    | chr19:36549391   | ZNF529                    | GRCh38                 |
| CD4CAR-ZFN-02  | step5      | Intact                    | chr19:56420178   | ZNF583                    | GRCh38                 |
| CD4CAR-ZFN-03  | step5      | Intact                    | chr3:52942390    | SFMBT1                    | GRCh38                 |
| CD4CAR-ZFN-03  | step5      | Intact                    | chr10:101687623  | FBXW4                     | GRCh38                 |
| CD4CAR-ZFN-03  | step5      | Intact                    | chr12:54973869   | TESPA1                    | GRCh38                 |
| CD4CAR-ZFN-05  | step5      | Intact                    | chr6:90021181    | BACH2                     | GRCh38                 |
| CD4CAR-ZFN-06  | step5      | Intact                    | chr16:19546275   | CCP110                    | GRCh38                 |
| CD4CAR-ZFN-06  | step5      | Intact                    | chr4:122211700   | KIAA1109                  | GRCh38                 |
| CD4CAR-ZFN-10  | step5      | Intact                    | chr19:56420968   | ZNF583                    | GRCh38                 |
| CD4CAR-ZFN-02  | step2      | hypermot                  | chr16:24966614   | ARHGAP17                  | GRCh38                 |
| CD4CAR-ZFN-02  | step5      | 5' defect                 | chr1:243287849   | SDCCAG8                   | GRCh38                 |
| CD4CAR-ZFN-02  | step5      | Premature Stop Codon      | chrY:34566782    | LOC124908590              | T2T                    |
| CD4CAR-ZFN-02  | step5      | Premature Stop Codon      | chr3:194985968   | nongenic                  | GRCh38                 |
| CD4CAR-ZFN-03  | step2      | hypermot                  | chr17:75806342   | UNK                       | GRCh38                 |
| CD4CAR-ZFN-06  | step2      | 5' defect                 | chr16:56996050   | NLRC5                     | GRCh38                 |
| CD4CAR-ZFN-06  | step5      | 5' defect                 | chr12:56177138   | SMARCC2                   | GRCh38                 |
| CD4CAR-ZFN-06  | step5      | 5' defect                 | chr3:156461730   | KCNAB1                    | GRCh38                 |
| CD4CAR-ZFN-08  | step2      | 5' defect                 | chr9:136932606   | nongenic                  | GRCh38                 |
| CD4CAR-ZFN-08  | step2      | Premature Stop Codon      | chr10:118307539  | FAM204A                   | GRCh38                 |
| CD4CAR-ZFN-08  | step2      | 5' defect                 | chr2:102408968   | nongenic                  | GRCh38                 |
| CD4CAR-ZFN-10  | step5      | hypermot                  | chr17:7504310    | POLR2A                    | GRCh38                 |

Supplemental Table 5: Summary of integration sites for indicated proviruses.
